# Supplementary material for: Hotspot DNA Methyltransferase 3A (DNMT3A) and Isocitrate Dehydrogenase 1 and 2 (IDH1/2) Mutations in Acute Myeloid Leukemia and Their Relevance as Targets for Immunotherapy
Source: MDPI journal article supplement (doi:10.3390/biomedicines12051086), 2024-05-14
Supplement: s1 [file s1]

## Supplementary Materials

Hotspot DNA Methyltransferase 3A (*DNMT3A*) and Isocitrate Dehydrogenase 1 and 2 (*IDH1/2*) Mutations in Acute Myeloid Leukemia and Their Relevance as Targets for Immunotherapy

Struckman *et al.*

**Table S1.** HLA class I typing of EBV-B cell lines.

| EBV-B cell line | HLA-A   |         | HLA-B   |         | HLA-C   |         |
|-----------------|---------|---------|---------|---------|---------|---------|
| HG00337         | A*03:01 | A*03:01 | B*07:02 | B*07:02 | C*07:02 | C*07:02 |
| HG00366         | A*02:01 | A*24:02 | B*07:02 | B*15:01 | C*03:03 | C*07:02 |
| HG00265         | A*01:01 | A*01:01 | B*08:01 | B*08:01 | C*07:01 | C*07:01 |
| HG00103         | A*02:01 | A*11:01 | B*35:01 | B*40:01 | C*03:04 | C*04:01 |
| JYW5098         | A*02:01 | A*02:01 | B*07:02 | B*07:02 | C*07:02 | C*07:02 |

HLA class I immunopeptidomics was performed on five EBV-B cell lines transduced with a minigene construct coding for *DNMT3A*, *IDH1* and *IDH2* hotspot mutations. The EBV-B cell lines were selected for expression of common HLA class I alleles present in at least 20% of European populations, i.e. HLA-A\*01:01, A\*02:01, A\*03:01, A\*24:02, B\*07:02, B\*08:01, C\*07:01, C\*07:02 and C\*03:03/03:04.

**Table S2.** Selected peptides, transitions and collision energy measurements during parallel reaction monitoring mass spectrometry.

| Precursor m/z | Fragment m/z | Sequence                | Fragment ion | Peptide variant | Collision energy (%) |
|---------------|--------------|-------------------------|--------------|-----------------|----------------------|
| 528,787838    | 245,185969   | SPNGTIQNIL              | y2           | light           | 17                   |
| 528,787838    | 698,34678    | SPNGTIQNIL              | b7           | light           | 17                   |
| 528,787838    | 812,389707   | SPNGTIQNIL              | b8           | light           | 17                   |
| 528,787838    | 925,473771   | SPNGTIQNIL              | b9           | light           | 17                   |
| 528,787838    | 406,698492   | SPNGTIQNIL              | b8           | light           | 17                   |
| 528,787838    | 463,240524   | SPNGTIQNIL              | b9           | light           | 17                   |
| 528,787838    | 449,243066   | SPNGTIQNIL              | a9           | light           | 17                   |
| 531,794742    | 245,185969   | SPNGTIQNIL              | y2           | heavy           | 17                   |
| 531,794742    | 704,360589   | SPNGTIQNIL              | b7           | heavy           | 17                   |
| 531,794742    | 818,403516   | SPNGTIQNIL              | b8           | heavy           | 17                   |
| 531,794742    | 931,48758    | SPNGTIQNIL              | b9           | heavy           | 17                   |
| 531,794742    | 409,705396   | SPNGTIQNIL              | b8           | heavy           | 17                   |
| 531,794742    | 466,247428   | SPNGTIQNIL              | b9           | heavy           | 17                   |
| 531,794742    | 452,249971   | SPNGTIQNIL              | a9           | heavy           | 17                   |
| 527,218931    | 890,367257   | YTDVSNMSH               | y8           | light           | 26                   |
| 527,218931    | 789,319579   | YTDVSNMSH               | y7           | light           | 26                   |
| 527,218931    | 674,292636   | YTDVSNMSH               | y6           | light           | 26                   |
| 527,218931    | 575,224222   | YTDVSNMSH               | y5           | light           | 26                   |
| 527,218931    | 265,118283   | YTDVSNMSH               | b2           | light           | 26                   |
| 527,218931    | 380,145226   | YTDVSNMSH               | b3           | light           | 26                   |
| 530,225835    | 896,381066   | YTDVSNMSH               | y8           | heavy           | 26                   |
| 530,225835    | 795,333388   | YTDVSNMSH               | y7           | heavy           | 26                   |
| 530,225835    | 680,306445   | YTDVSNMSH               | y6           | heavy           | 26                   |
| 530,225835    | 575,224222   | YTDVSNMSH               | y5           | heavy           | 26                   |
| 530,225835    | 265,118283   | YTDVSNMSH               | b2           | heavy           | 26                   |
| 530,225835    | 380,145226   | YTDVSNMSH               | b3           | heavy           | 26                   |
| 535,216388    | 906,362172   | YTDVSNM[+15.994915]SH   | y8           | light           | 26                   |
| 535,216388    | 805,314494   | YTDVSNM[+15.994915]SH   | y7           | light           | 26                   |
| 535,216388    | 690,287551   | YTDVSNM[+15.994915]SH   | y6           | light           | 26                   |
| 535,216388    | 591,219137   | YTDVSNM[+15.994915]SH   | y5           | light           | 26                   |
| 535,216388    | 265,118283   | YTDVSNM[+15.994915]SH   | b2           | light           | 26                   |
| 535,216388    | 380,145226   | YTDVSNM[+15.994915]SH   | b3           | light           | 26                   |
| 538,223293    | 912,375981   | YTDVSNM[+15.994915]SH   | y8           | heavy           | 26                   |
| 538,223293    | 811,328303   | YTDVSNM[+15.994915]SH   | y7           | heavy           | 26                   |
| 538,223293    | 696,30136    | YTDVSNM[+15.994915]SH   | y6           | heavy           | 26                   |
| 538,223293    | 591,219137   | YTDVSNM[+15.994915]SH   | y5           | heavy           | 26                   |
| 538,223293    | 265,118283   | YTDVSNM[+15.994915]SH   | b2           | heavy           | 26                   |
| 538,223293    | 380,145226   | YTDVSNM[+15.994915]SH   | b3           | heavy           | 26                   |
| 627,276977    | 1090,48335   | YTDVSNM[+15.994915]SHLA | y10          | light           | 26                   |
| 627,276977    | 989,435671   | YTDVSNM[+15.994915]SHLA | y9           | light           | 26                   |
| 627,276977    | 874,408728   | YTDVSNM[+15.994915]SHLA | y8           | light           | 26                   |
| 627,276977    | 775,340314   | YTDVSNM[+15.994915]SHLA | y7           | light           | 26                   |
| 627,276977    | 265,118283   | YTDVSNM[+15.994915]SHLA | b2           | light           | 26                   |
| 627,276977    | 380,145226   | YTDVSNM[+15.994915]SHLA | b3           | light           | 26                   |
| 630,785559    | 1097,500514  | YTDVSNM[+15.994915]SHLA | y10          | heavy           | 26                   |
| 630,785559    | 996,452835   | YTDVSNM[+15.994915]SHLA | y9           | heavy           | 26                   |
| 630,785559    | 881,425892   | YTDVSNM[+15.994915]SHLA | y8           | heavy           | 26                   |
| 630,785559    | 782,357478   | YTDVSNM[+15.994915]SHLA | y7           | heavy           | 26                   |
| 630,785559    | 265,118283   | YTDVSNM[+15.994915]SHLA | b2           | heavy           | 26                   |
| 630,785559    | 380,145226   | YTDVSNM[+15.994915]SHLA | b3           | heavy           | 26                   |
| 619,27952     | 1074,488435  | YTDVSNMSHLA             | y10          | light           | 26                   |
| 619,27952     | 973,440756   | YTDVSNMSHLA             | y9           | light           | 26                   |
| 619,27952     | 858,413813   | YTDVSNMSHLA             | y8           | light           | 26                   |
| 619,27952     | 759,345399   | YTDVSNMSHLA             | y7           | light           | 26                   |
| 619,27952     | 265,118283   | YTDVSNMSHLA             | b2           | light           | 26                   |
| 619,27952     | 380,145226   | YTDVSNMSHLA             | b3           | light           | 26                   |
| 622,788102    | 1081,505599  | YTDVSNMSHLA             | y10          | heavy           | 26                   |
| 622,788102    | 980,45792    | YTDVSNMSHLA             | y9           | heavy           | 26                   |
| 622,788102    | 865,430977   | YTDVSNMSHLA             | y8           | heavy           | 26                   |
| 622,788102    | 766,362563   | YTDVSNMSHLA             | y7           | heavy           | 26                   |
| 622,788102    | 265,118283   | YTDVSNMSHLA             | b2           | heavy           | 26                   |
| 622,788102    | 380,145226   | YTDVSNMSHLA             | b3           | heavy           | 26                   |

**Figure S1.** DNMT3A<sup>R882H</sup> 9mer YTDVSNMSH is not presented on AML.

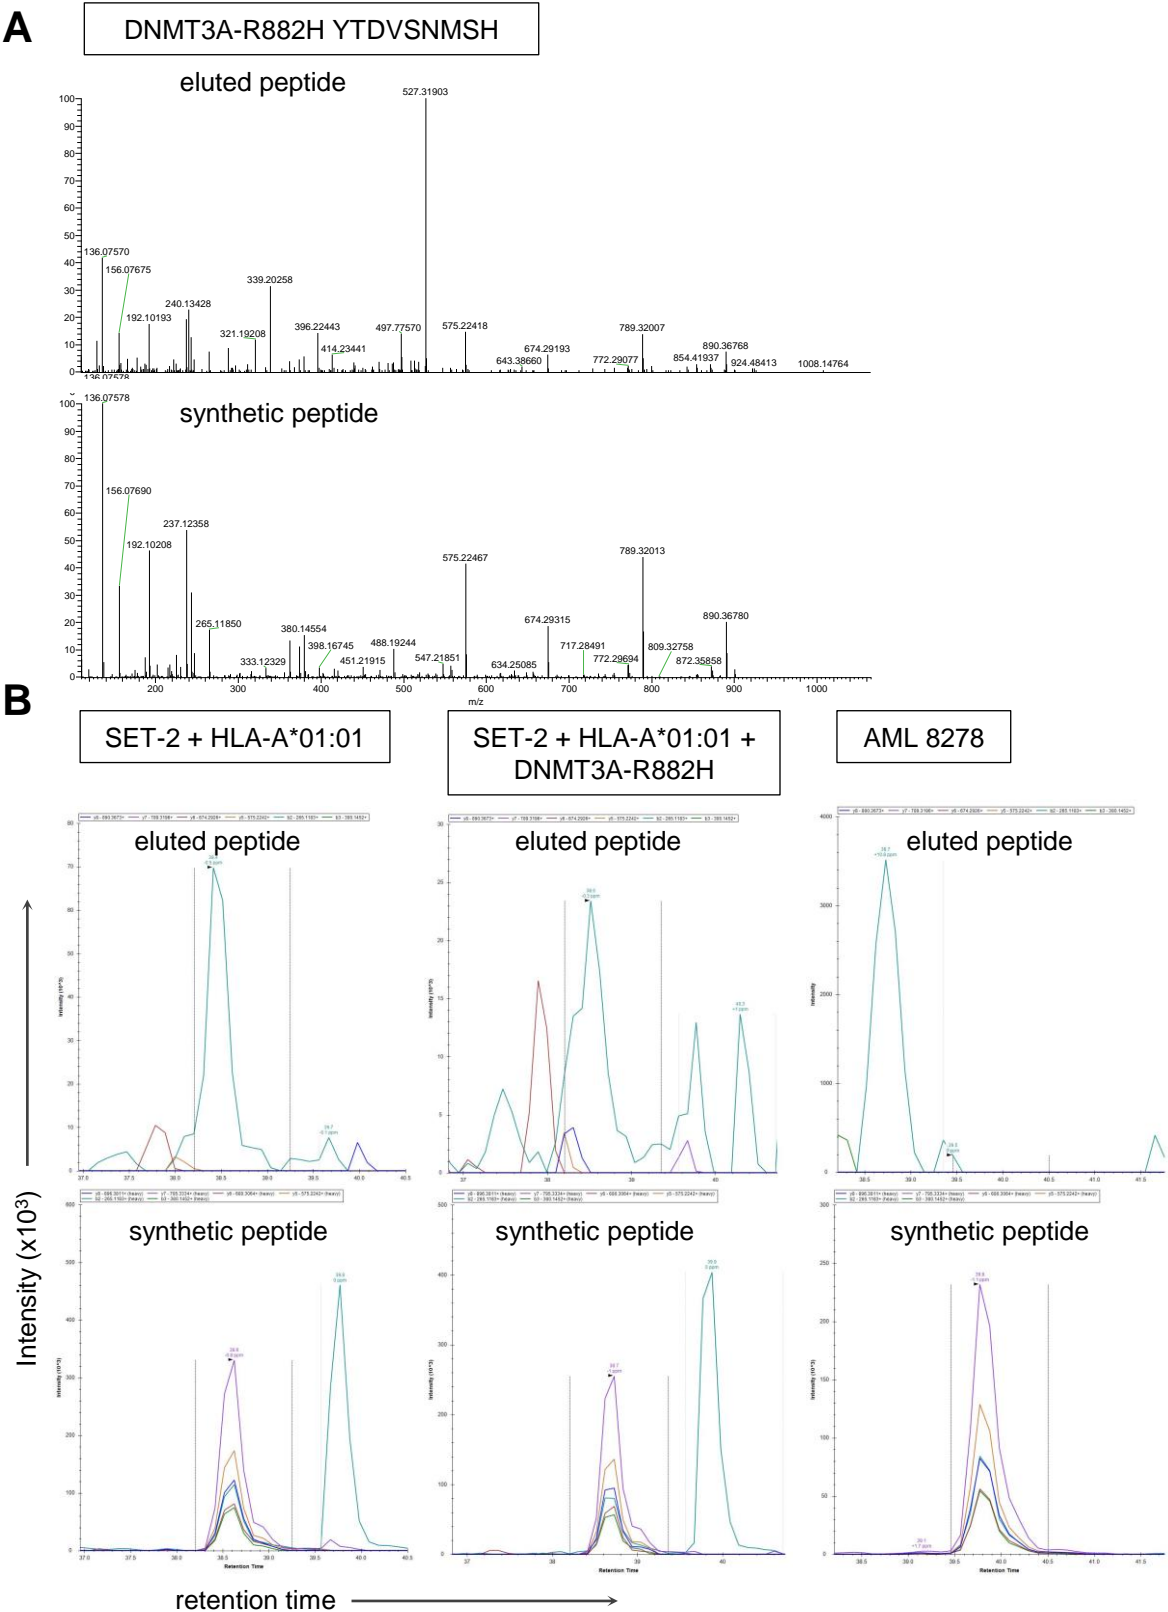

**(A)** The HLA-A\*01:01-binding DNMT3A<sup>R882H</sup>-derived 9-mer YTDVSNMSH peptide was eluted from EBV-B cell line HG00265 transduced with the retroviral minigene construct. Peptide sequence was identified by MS/MS and validated by comparing eluted and synthetic peptide mass spectra. **(B)** Mass chromatograms of YTDVSNMSH by PRM-MS. HLA eluates from AML cell line SET-2 (DNMT3A<sup>R882H</sup>) transduced with HLA-A\*01:01, SET-2 transduced with HLA-A\*01:01 and the full-length DNMT3A<sup>R882H</sup> gene and AML sample 8278 (DNMT3A<sup>R882H</sup>, HLA-A\*01:01) were injected into the mass spectrometer and spiked with 20 fmol YTDVSNMSH (heavy amino acid bold and underlined) as a reference.

**Table S3.** Predicted HLA class I-binding DNMT3A, IDH1, and IDH2 neopeptides.

| Gene      | Mutation          | Prevalence         | Predicted peptide | HLA     | NetMHCpan 4.1<br>predicted binding | Wildtype variant | NetMHCpan 4.1<br>predicted binding<br>(%Rank) |       |    |
|-----------|-------------------|--------------------|-------------------|---------|------------------------------------|------------------|-----------------------------------------------|-------|----|
| DNMT3A    | c.2645G>A / R882H | 9.6% <sup>16</sup> | YTDVSNMSHLA       | A*01:01 | 0.701                              | WB               | YTDVSNMSRLA                                   | 1.089 | WB |
|           |                   |                    | YTDVSNMSHL        | A*01:01 | 0.643                              | WB               | YTDVSNMSRL                                    | 0.617 | WB |
|           |                   |                    | YTDVSNMSH         | A*01:01 | 0.107                              | SB               | YTDVSNMSR                                     | 0.438 | SB |
|           |                   |                    | VHYTDVSNMSH       | A*01:01 | 1.389                              | WB               | VHYTDVSNMSR                                   | 3.168 |    |
|           |                   |                    | HYTDVSNMSH        | A*01:01 | 0.808                              | WB               | HYTDVSNMSR                                    | 1.885 | WB |
|           |                   |                    | MSHLARQRL         | B*07:02 | 1.353                              | WB               | MSRLARQRL                                     | 0.683 | WB |
|           |                   |                    | MSHLARQRL         | B*08:01 | 1.569                              | WB               | MSRLARQRL                                     | 1.164 | WB |
|           |                   |                    | SHLARQRLL         | B*08:01 | 1.489                              | WB               | SRLARQRLL                                     | 1.234 | WB |
|           |                   |                    | HLARQRLL          | B*08:01 | 0.626                              | WB               | RLARQRLL                                      | 2.895 |    |
|           |                   |                    | YTDVSNMSHL        | C*03:04 | 1.004                              | WB               | YTDVSNMSRL                                    | 1.175 | WB |
|           |                   |                    | MSHLARQRL         | C*03:04 | 0.381                              | SB               | MSRLARQRL                                     | 1.525 | WB |
|           |                   |                    | SHLARQRLL         | C*07:01 | 0.419                              | SB               | SRLARQRLL                                     | 0.070 | SB |
|           |                   |                    | HYTDVSNMSHL       | C*07:02 | 1.698                              | WB               | HYTDVSNMSRL                                   | 2.423 |    |
|           |                   |                    | SHLARQRLL         | C*07:02 | 0.647                              | WB               | SRLARQRLL                                     | 0.298 | SB |
|           | c.2644C>T / R882C | 2.5% <sup>16</sup> | YTDVSNMSCLA       | A*01:01 | 1.061                              | WB               | YTDVSNMSRLA                                   | 1.089 | WB |
|           |                   |                    | YTDVSNMSCL        | A*01:01 | 0.787                              | WB               | YTDVSNMSRL                                    | 0.617 | WB |
|           |                   |                    | YTDVSNMSC         | A*01:01 | 0.793                              | WB               | YTDVSNMSR                                     | 0.438 | SB |
|           |                   |                    | SCLARQRLL         | B*08:01 | 1.685                              | WB               | SRLARQRLL                                     | 1.234 | WB |
|           |                   |                    | YTDVSNMSCL        | C*03:04 | 1.323                              | WB               | YTDVSNMSRL                                    | 1.175 | WB |
|           |                   |                    |                   |         |                                    |                  |                                               |       |    |
| IDH1      | c.394C>T / R132C  | 3.6% <sup>17</sup> | KPIIIGCHAY        | B*07:02 | 1.390                              | WB               | KPIIIGRHAY                                    | 0.762 | WB |
|           |                   |                    | KPIIIGCHA         | B*07:02 | 1.526                              | WB               | KPIIIGRHA                                     | 0.744 | WB |
|           | c.394C>G / R132G  | 0.6% <sup>17</sup> | IIGGHAYGDQY       | A*01:01 | 1.807                              | WB               | IIGRHAYGDQY                                   | 2.528 |    |
|           |                   |                    | KPIIIGGHAY        | B*07:02 | 1.023                              | WB               | KPIIIGRHAY                                    | 0.762 | WB |
|           | c.395G>A / R132H  | 0.4% <sup>17</sup> | KPIIIGGHA         | B*07:02 | 0.947                              | WB               | KPIIIGRHA                                     | 0.744 | WB |
|           |                   |                    | IIGHHAYGDQY       | A*01:01 | 1.997                              | WB               | IIGRHAYGDQY                                   | 2.528 |    |
|           |                   |                    | KPIIIGHHAY        | B*07:02 | 1.054                              | WB               | KPIIIGRHAY                                    | 0.762 | WB |
|           |                   |                    | KPIIIGHHA         | B*07:02 | 0.669                              | WB               | KPIIIGRHA                                     | 0.744 | WB |
|           |                   |                    | GHHAYGDQY         | C*07:01 | 1.921                              | WB               | GRHAYGDQY                                     | 0.302 | SB |
|           |                   |                    | GHHAYGDQY         | C*07:02 | 1.082                              | WB               | GRHAYGDQY                                     | 0.399 | SB |
|           | c.394C>A / R132S  | 0.4% <sup>17</sup> | IIIGSHAYGDQY      | A*01:01 | 1.594                              | WB               | IIIGRHAYGDQY                                  | 3.413 |    |
|           |                   |                    | IIGSHAYGDQY       | A*01:01 | 1.044                              | WB               | IIGRHAYGDQY                                   | 2.528 |    |
|           |                   |                    | IGSHAYGDQY        | A*01:01 | 0.686                              | WB               | IGRHAYGDQY                                    | 4.466 |    |
|           |                   |                    | PIIIGSHAY         | A*01:01 | 1.950                              | WB               | PIIIGRHAY                                     | 3.330 |    |
|           |                   |                    | GSHAYGDQY         | A*01:01 | 0.345                              | SB               | GRHAYGDQY                                     | 6.370 |    |
|           |                   |                    | KPIIIGSHAY        | B*07:02 | 1.053                              | WB               | KPIIIGRHAY                                    | 0.762 | WB |
| KPIIIGSHA |                   |                    | B*07:02           | 0.652   | WB                                 | KPIIIGRHA        | 0.744                                         | WB    |    |
|           |                   |                    |                   |         |                                    |                  |                                               |       |    |
| IDH2      | c.419G>A / R140Q  | 5.4% <sup>18</sup> | KSPNGTIQNI        | B*07:02 | 0.811                              | WB               | KSPNGTIRNI                                    | 0.838 | WB |
|           |                   |                    | SPNGTIQNIL        | B*07:02 | 0.167                              | SB               | SPNGTIRNIL                                    | 0.027 | SB |
|           |                   |                    | SPNGTIQNI         | B*07:02 | 0.192                              | SB               | SPNGTIRNI                                     | 0.146 | SB |
|           | c.515G>A / R172K  | 2.1% <sup>18</sup> | ITIGKHAHGDQY      | A*01:01 | 0.568                              | WB               | ITIGRHAHGDQY                                  | 0.582 | WB |
|           |                   |                    | TIGKHAHGDQY       | A*01:01 | 1.408                              | WB               | TIGRHAHGDQY                                   | 1.461 | WB |
|           |                   |                    | VPGWTKPITIGK      | A*03:01 | 0.983                              | WB               | VPGWTKPITIGR                                  | 4.900 |    |
|           |                   |                    | GWTKPITIGK        | A*03:01 | 0.112                              | SB               | GWTKPITIGR                                    | 1.139 | WB |
|           |                   |                    | WTKPITIGK         | A*03:01 | 0.270                              | SB               | WTKPITIGR                                     | 1.417 | WB |
|           |                   |                    | KPITIGKHAH        | B*07:02 | 1.466                              | WB               | KPITIGRHAH                                    | 1.108 | WB |
|           |                   |                    | KPITIGKHA         | B*07:02 | 0.724                              | WB               | KPITIGRHA                                     | 0.583 | WB |

Peptide sequences of 21 amino acids with the mutated amino acid encoded by *DNMT3A*, *IDH1* or *IDH2* hotspot mutations at position 11 were searched for 9-, 10- and 11-mer neopeptides with predicted binding to common HLA class I alleles with population frequencies above 20% in European populations by NetMHCpan4.1. Indicated is the mutation prevalence according to Ley et al. (2010) [16], Schnittger et al. (2010) [17] and Koszarska et al. (2013) [18]. Peptides with predicted binding  $\leq 0.5\%$ Rank are strong binders (SB), and peptides with predicted binding  $0.5\% > \text{Rank} \leq 2.0\%$  are weak binders (WB). Predicted HLA class I binding is also shown for wildtype peptide variants.

**Figure S2.** *DNMT3A* and *IDH2* mutations in SET-2 and K562-R140Q.

**A. SET-2**

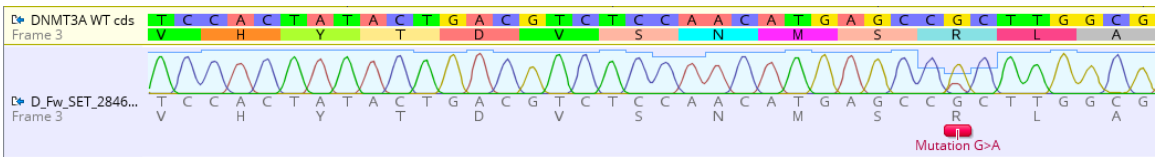

**B. K562-R140Q**

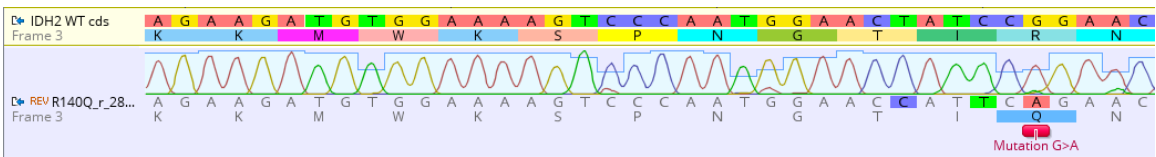

RNA was isolated and cDNA generated from AML cell line SET-2 (*DNMT3A*<sup>R882H</sup>) and chronic myelogenous leukemia cell line K562-R140Q in which bi-allelic *IDH2*<sup>R140Q</sup> mutations were introduced by CRISPR/Cas9 mediated genome editing [24]. Mutations were validated by targeted PCR and Sanger sequencing. **(A)** DNA sequence of the *DNMT3A* gene in SET-2 shows a heterozygous c.2645G>A (R882H) mutation. **(B)** DNA sequence of the *IDH2* gene in K562-R140Q shows a homozygous c.419G>A (R140Q) mutation.

**Figure S3.** Surface presentation of YTDVSNMSHLA and SPNGTIQNIL is not detected by PRM-MS on AML cells with *DNMT3A*<sup>R882H</sup> or *IDH2*<sup>R140Q</sup> mutations.

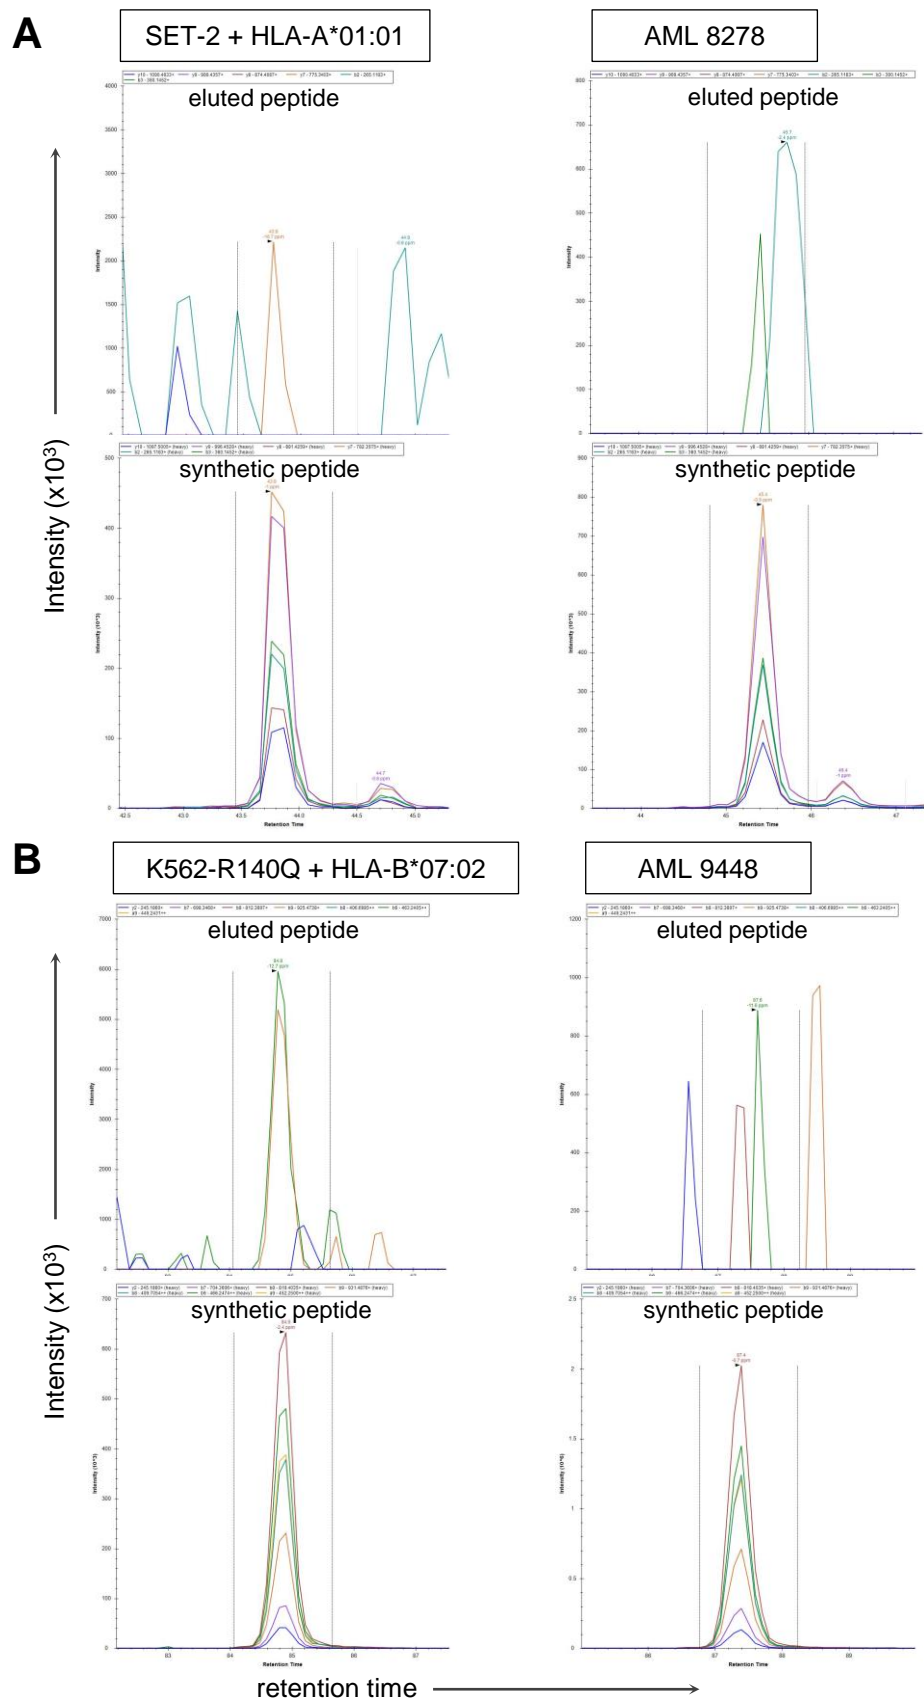

**(A)** Mass chromatograms showed no YTDVSNMSHLA in HLA-eluates of SET-2 (*DNMT3A*<sup>R882H</sup>) transduced with HLA-A\*01:01 and AML sample 8278 (*DNMT3A*<sup>R882H</sup>, HLA-A\*01:01). Heavy-isotope labeled YTDVSNMSHLA (heavy amino acid bold and underlined) was spiked-in as a reference. **(B)** Mass chromatograms showed no SPNGTIQNIL in HLA-eluates of K562-R140Q transduced with HLA-B\*07:02 and AML sample 9448 (*IDH2*<sup>R140Q</sup>, HLA-B\*07:02). Heavy-isotope labeled SPNGTIQNIL was spiked-in as a reference.

**Figure S4.** HLA class I surface expression on AML samples and cell lines.

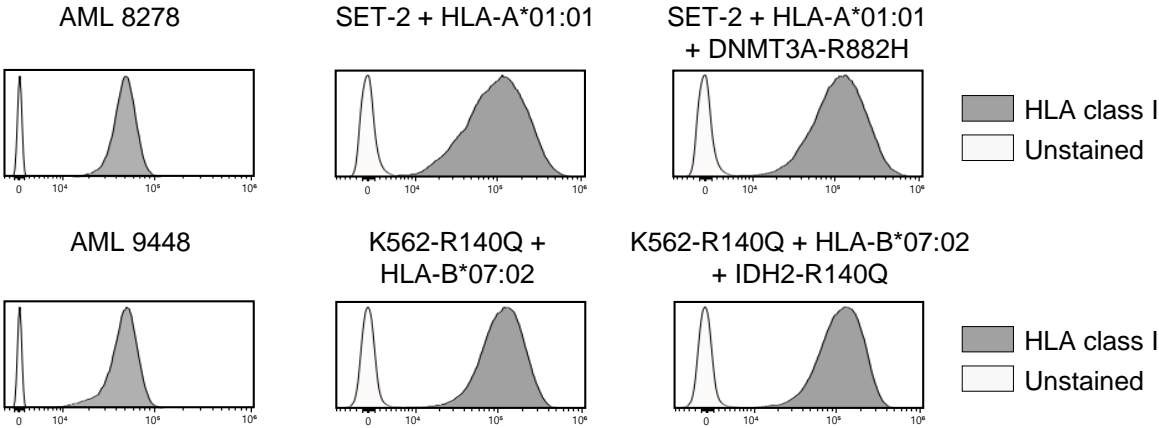

Mean fluorescence intensity after staining of patient AML samples and AML cell lines with a fluorescent antibody against HLA class I by flow cytometry.



**Table S4.** Isolation of DNMT3A<sup>R882H</sup>-specific T-cell clones.

| Donor              | HLA-A  |        | HLA-B  |        | Reactivity against<br>DNMT3A <sup>R882H</sup> peptide | Reactivity against transduced<br>DNMT3A <sup>R882H</sup> gene |
|--------------------|--------|--------|--------|--------|-------------------------------------------------------|---------------------------------------------------------------|
| 3                  | *01:01 | *02:01 | *07:02 | *08:01 | 1                                                     | 0                                                             |
| 5                  | *01:01 | *03:XX | *07:02 | *08:01 | 1                                                     | 0                                                             |
| 8                  | *01:XX | *03:XX | *13:XX | *14:XX | 3                                                     | 1                                                             |
| 10                 | *01:01 | *03:01 | *08:01 | *35:01 | 0                                                     |                                                               |
| 21                 | *01:01 | *11:XX | *08:01 | *56:01 | 0                                                     |                                                               |
| 22                 | *01:01 | *03:01 | *08:01 | *35:01 | 1                                                     | 0                                                             |
| 23                 | *01:01 | *03:01 | *08:01 | *44:02 | 0                                                     |                                                               |
| 24                 | *01:01 | *03:01 | *08:01 | *13:02 | 0                                                     |                                                               |
| 25                 | *01:01 |        | *08:01 |        | 0                                                     |                                                               |
| 30                 | *01:01 | *03:01 | *07:02 | *08:01 | 0                                                     |                                                               |
| 31                 | *01:01 | *03:01 | *35:01 | *51:01 | 1                                                     | 0                                                             |
| 35                 | *01:01 | *03:01 | *07:02 | *08:01 | 2                                                     | 0                                                             |
| 12                 | *01:XX | *03:XX | *07:XX | *18:XX | 0                                                     |                                                               |
| 16                 | *01:XX | *02:XX | *38:XX | *57:XX | 0                                                     |                                                               |
| 17-I <sup>C</sup>  | *01:XX | *24:XX | *07:02 | *15:17 | 7                                                     | 2                                                             |
| 17-II <sup>C</sup> | *01:XX | *24:XX | *07:02 | *15:17 | 17                                                    | 2                                                             |
| 11                 | -      | -      | -      | -      | 0                                                     |                                                               |
| 13                 | -      | -      | -      | -      | 0                                                     |                                                               |
| 18                 | -      | -      | -      | -      | 0                                                     |                                                               |
| 19                 | -      | -      | -      | -      | 0                                                     |                                                               |
| 14                 | *11:01 | *24:02 | *35:01 | *45:01 | 0                                                     |                                                               |
| 15                 | *02:XX | *32:XX | *14:XX | *40:XX | 0                                                     |                                                               |
| 20                 | *03:XX | *24:XX | *14:01 | *15:01 | 0                                                     |                                                               |
| 32                 | *03:01 | *25:01 | *07:02 | *18:01 | 0                                                     |                                                               |
| 33                 | *02:01 | *03:01 | *07:02 | *51:01 | 0                                                     |                                                               |
| 34                 | *11:01 | *68:01 | *27:05 | *57:01 | 0                                                     |                                                               |
| <b>26</b>          |        |        |        |        | <b>43</b>                                             | <b>5</b>                                                      |

PBMC from 26 healthy individuals were screened for DNMT3A<sup>R882H</sup>-specific CD8 T cells. Single cell sorted pHLA-tetramer-positive CD8 T-cell clones were isolated and screened for specific recognition of HLA-A\*01:01 positive EBV-B cells loaded with YTDVSNMSHLA by IFN- $\gamma$  ELISA. T-cell clones that were peptide-specific were tested for reactivity against K562 transduced with HLA-A\*01:01 and the *DNMT3A<sup>R882H</sup>* gene and HL-60 (HLA-A\*01:01 positive) transduced with the *DNMT3A<sup>R882H</sup>* gene. Five T cell clones from two healthy donors (donors 8 & 17) were reactive against the *DNMT3A<sup>R882H</sup>* but not wildtype *DNMT3A* gene. Donor 17 has been screened twice (17-I<sup>C</sup> & 17-II<sup>C</sup>).

**Table S5.** Isolation of IDH2<sup>R140Q</sup>-specific T-cell clones.

| Donor              | HLA-A  |           | HLA-B  |        | Reactivity against IDH2 <sup>R140Q</sup> peptide | Reactivity against the transduced IDH2 <sup>R140Q</sup> gene |
|--------------------|--------|-----------|--------|--------|--------------------------------------------------|--------------------------------------------------------------|
| 1                  | *03:01 | *26:01    | *07:02 | *27:05 | 1                                                | 1                                                            |
| 2                  | *02:01 | *03:01    | *07:02 | *51:01 | 0                                                |                                                              |
| 3                  | *01:01 | *02:01    | *07:02 | *08:01 | 0                                                |                                                              |
| 4                  | *02:01 | *03:01    | *07:02 | *44:02 | 0                                                |                                                              |
| 5                  | *01:01 | *03:XX    | *07:02 | *08:01 | 1                                                | 1                                                            |
| 6                  | *02:01 | *03:01    | *07:02 | *51:01 | 1                                                | 0                                                            |
| 7                  | *02:01 | *03:01    | *07:02 | -      | 1                                                | 0                                                            |
| 17-I <sup>C</sup>  | *01:XX | *24:XX    | *07:02 | *15:17 | 0                                                |                                                              |
| 17-II <sup>C</sup> | *01:XX | *24:XX    | *07:02 | *15:17 | 0                                                |                                                              |
| 28                 | *03:01 | *11:01    | *07:02 | *40:02 | 0                                                |                                                              |
| 30                 | *01:01 | *03:01    | *07:02 | *08:01 | 1                                                | 0                                                            |
| 32                 | *03:01 | *25:01    | *07:02 | *18:01 | 0                                                |                                                              |
| 33                 | *02:01 | *03:01    | *07:02 | *51:01 | 1                                                | 1                                                            |
| 35                 | *01:01 | *03:01    | *07:02 | *08:01 | 0                                                |                                                              |
| 12                 | *01:XX | *03:XX    | *07:XX | *18:XX | 0                                                |                                                              |
| 26                 | *02:XX | *11:XX    | *07:XX | *15:XX | 0                                                |                                                              |
| 11                 | -      | -         | -      | -      | 0                                                |                                                              |
| 13                 | -      | -         | -      | -      | 0                                                |                                                              |
| 18                 | -      | -         | -      | -      | 0                                                |                                                              |
| 19                 | -      | -         | -      | -      | 0                                                |                                                              |
| 9                  | *01:XX | *11:XX    | *08:XX | *13:XX | 0                                                |                                                              |
| 10                 | *01:01 | *03:01    | *08:01 | *35:01 | 0                                                |                                                              |
| 14                 | *11:01 | *24:02    | *35:01 | *45:01 | 0                                                |                                                              |
| 15                 | *02:XX | *32:XX    | *14:XX | *40:XX | 0                                                |                                                              |
| 16                 | *01:XX | *02:XX    | *38:XX | *57:XX | 0                                                |                                                              |
| 20                 | *03:XX | *24:XX    | *14:01 | *15:01 | 0                                                |                                                              |
| 27                 | *03:XX | *68/69:XX | *15:01 | *27:XX | 0                                                |                                                              |
| 29                 | *02:01 | *03:01    | *35:01 | *57:01 | 0                                                |                                                              |
| 31                 | *01:01 | *03:01    | *35:01 | *51:01 | 0                                                |                                                              |
| 34                 | *11:01 | *68:01    | *27:05 | *57:01 | 0                                                |                                                              |
| 30                 |        |           |        |        | 5                                                | 3                                                            |

PBMC from 30 healthy individuals were screened for IDH2<sup>R140Q</sup>-specific CD8 T cells. Single cell sorted pHLA-tetramer-positive CD8 T-cell clones were isolated and screened for specific recognition of HLA-B\*07:02 positive EBV-B cells loaded with SPNGTIQNIL by IFN-γ ELISA. T-cell clones that were peptide-specific were tested for reactivity against K562 transduced with HLA-B\*07:02 and the full-length IDH2<sup>R140Q</sup> gene. Three T-cell clones were reactive against the IDH2<sup>R140Q</sup> but not wildtype IDH2 gene.

**Figure S5.** Gating strategy for isolation of DNMT3A<sup>R882H</sup> or IDH2<sup>R140Q</sup>-specific CD8 T cells by flow cytometry.

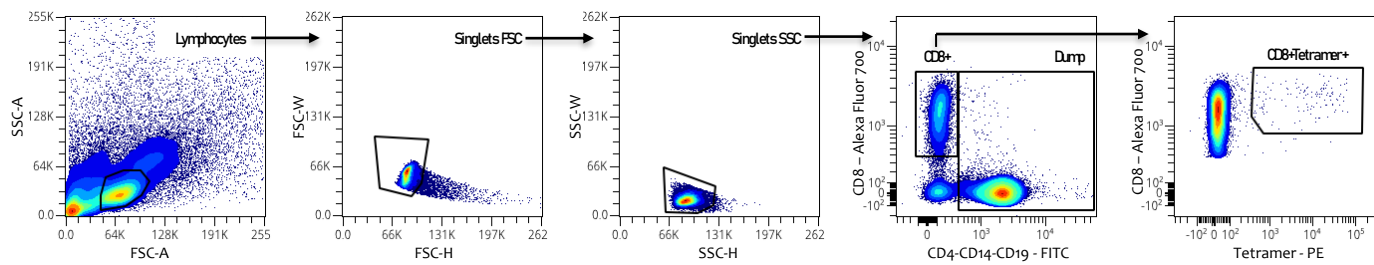

PBMC enriched for pHLA-tetramer-positive CD8 T cells were gated for single-cell lymphocytes that were negative for CD4, CD14 and CD19 (dump). pHLA-tetramer positive T cells within the CD8 gate were single-cell sorted by FACS.

**Figure S6. Recognition of patient-derived AML samples by T-cell clone 8.6F10.**

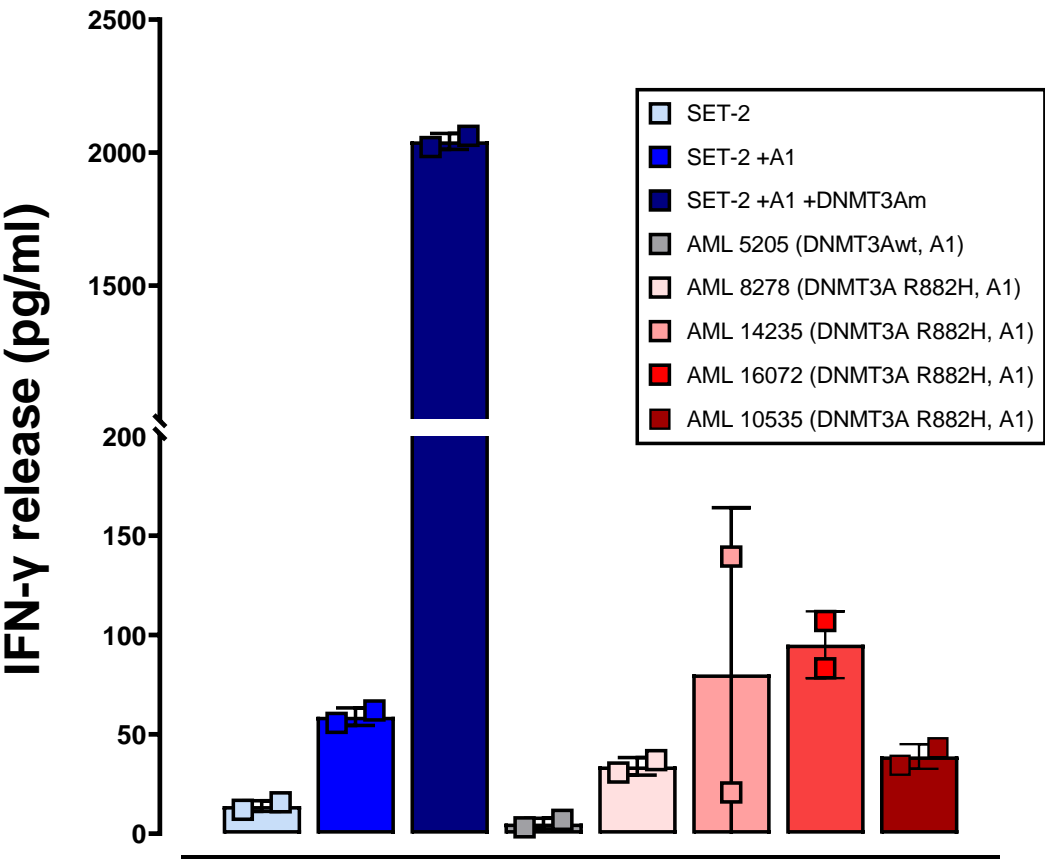

Reactivity of T-cell clone 8.6F10 was tested against AML cell line SET-2 (*DNMT3A<sup>R882H</sup>*), SET-2 transduced with HLA-A\*01:01 (SET-2 +A1), SET-2 transduced with HLA-A\*01:01 and the full-length *DNMT3A<sup>R882H</sup>* gene (SET-2 +A1 +DNMT3Am) and four HLA-A\*01:01 and *DNMT3A<sup>R882H</sup>* patient-derived AML samples 8278, 14235, 16072 and 10535. Patient-derived AML 5205 (HLA-A\*01:01, wildtype *DNMT3A*) was included as negative control. IFN-γ release in duplicate wells of a single experiment are shown.

**Figure S7.** Surface expression of HLA class I and adhesion molecules on AML patient samples.

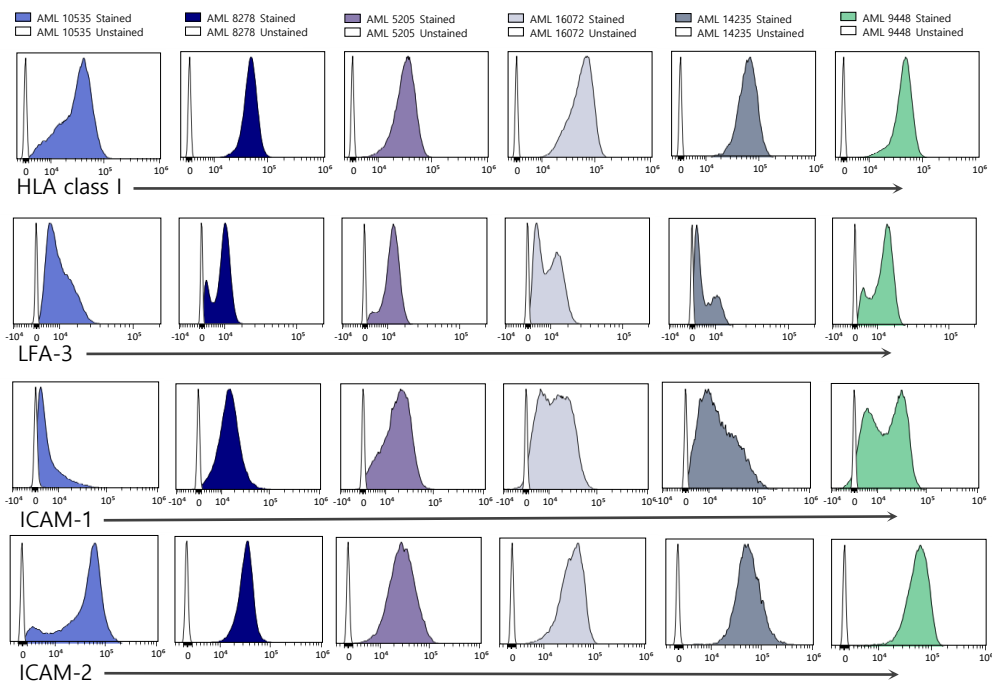

Mean Fluorescence Intensity (MFI) of patient AML samples stained with fluorescent antibodies against HLA class I, LFA-3 (Lymphocyte Function-Associated antigen 3), ICAM-1 (InterCellular Adhesion Molecule-1) or ICAM-2 (InterCellular Adhesion Molecule-2) by flow cytometry. Unstained samples are shown as controls.
